# Supplementary material for: Development of a working core outcome set for cutaneous lupus erythematosus: a practical approach to an urgent unmet need
Source: PubMed Central journal article supplement — Lupus Sci Med. 2021 Dec 22;8(1):e000529. doi: 10.1136/lupus-2021-000529 (PMC8718411; doi:10.1136/lupus-2021-000529), 2021-12-22
Supplement: lupus-2021-000529supp001.pdf [file lupus-2021-000529supp001.pdf]

## **Appendix 1: Identification of Cutaneous Lupus Erythematosus (CLE) and Systemic Lupus Erythematosus (SLE) Randomized Controlled Trials (RCTs)**

### **Search Strategy MEDLINE (Ovid)**

- From inception to January 28, 2021
- RCT search filters used: Cochrane RCT terms as identified in Cochrane Handbook 5.1

1 randomized controlled trial.pt. (521766)  
2 controlled clinical trial.pt. (94043)  
3 randomi#ed.ab. [modified to pick up 's' and 'z' variants] (610182)  
4 placebo.ab. (215459)  
5 clinical trials as topic.sh. (194466)  
6 randomly.ab. (351188)  
7 trial.ti. (235051)  
8 or/1-7 (1385623)  
9 exp animals/ not humans.sh. (4781739)  
10 8 not 9 [Cochrane RCT Filter: sensitivity- and precision-maximizing version (2008 revision)]  
(1278027)  
11 exp Lupus Erythematosus, Cutaneous/ (5114)  
12 cutaneous lupus.mp. (2045)  
13 exp Lupus Erythematosus, Discoid/ (3200)  
14 discoid lupus.mp. (1781)  
15 exp Chilblains/ (443)  
16 chilblain lupus.mp. (158)  
17 exp Panniculitis, Lupus Erythematosus/ (276)  
18 panniculitis, lupus erythematosus.mp. (277)  
19 lupus erythematosus profundus.mp. (144)  
20 lupus tumidus.mp. (33)  
21 or/11-20 (6640)  
22 10 and 21 (136)

### **Search Strategy for EMBASE:**

- From inception to January 28, 2021
- RCT search filters used: Cochrane RCT Filter: sensitivity- and precision-maximizing version (2008 revision)

'skin lupus erythematosus'/exp OR 'skin lupus erythematosus':ti,ab,kw OR 'cutaneous and lupus':ti,ab,kw OR 'discoid lupus erythematosus' OR 'discoid lupus':ti,ab,kw OR 'chilblain' OR 'chilblain':ti,ab,kw OR 'lupus panniculitis' OR 'lupus panniculitis':ti,ab,kw OR 'lupus profundus' OR 'lupus profundus':ti,ab,kw OR 'lupus tumidus' OR 'lupus tumidus':ti,ab,kw) AND ((random\$:ti,ab,kw OR factorial\$:ti,ab,kw OR crossover\$:ti,ab,kw OR placebo\$:ti,ab,kw OR assign\$:ti,ab,kw OR allocat\$:ti,ab,kw OR volunteer\$:ti,ab,kw OR 'crossover procedure' OR 'double blind procedure' OR 'randomized controlled trial' OR 'single blind procedure' OR (singl\* NEAR/3 blind\*):ti,ab,kw OR (doubl\* NEAR/3 blind\*):ti,ab,kw) NOT ('animal'/exp NOT 'human'/exp))

**Search Strategy for *ClinicalTrials.gov*:**

**CLE:**

Filter for phase 2, 3 and 4 clinical trials

Search terms:

“cutaneous lupus erythematosus”

“cutaneous lupus”

“lupus cutaneous”

“lupus discoid”

“lupus erythematosus, discoid”

“lupus erythematosus, cutaneous”

**SLE:**

Filter for phase 3 and 4 clinical trials

Search terms:

“lupus erythematosus”

## **Appendix 2: Identification of Studies Evaluating the Measurement Properties of Outcome Measures in CLE Patients**

### **Search Strategy for PubMed**

- From inception to February 2, 2021
- Validation studies filters used: Terwee CB, Jansma EP, Riphagen II, de Vet HC. [Development of a methodological PubMed search filter for finding studies on measurement properties of measurement instruments](#). Qual Life Res. 2009 Oct;18(8):1115-23. doi: 10.1007/s11136-009-9528-5.

((Disease Area and Severity Index[tiab] OR CLASI[tiab] OR Score of Activity and Damage[tiab] OR SADDLE[tiab] OR Global Assessment[tiab] OR PGA[tiab] OR IGA[tiab] OR Life quality[tiab] OR Quality of life[tiab] OR DLQI[tiab] OR Skindex[tiab] OR SF-36[tiab] OR SF36[tiab] OR short form 36[tiab] OR EuroQoL[tiab] OR EQ5D[tiab] OR EQ-5D[tiab] OR EQ5D OR CLEQoL[tiab] OR LupusPRO[tiab] OR SLEQOL[tiab] OR LupusQoL[tiab] OR L-QoL[tiab] OR Visual Analogue Scale[tiab] OR VAS[tiab] OR Numeric Rating Scale[tiab] OR NRS[tiab] OR Worst Pain[tiab] OR Promis[tiab] OR McGill Pain[tiab] OR Brief Pain Inventory[tiab] OR BPI[tiab] OR Global Skin Health[tiab] OR Global Improvement[tiab] OR Patient Global[tiab]) AND ("Lupus Erythematosus, Cutaneous"[Mesh] OR "Lupus Erythematosus, Discoid"[Mesh] OR Cutaneous lupus[tiab] or Discoid lupus[tiab] or Lupus erythematosus profundus[tiab] or Chilblain lupus[tiab] or Lupus tumidus[tiab])) AND ((instrumentation[sh] OR methods[sh] OR Validation Studies[pt] OR Comparative Study[pt] OR "psychometrics"[MeSH] OR psychometr\*[tiab] OR clinimetr\*[tw] OR clinometr\*[tw] OR "outcome assessment (health care)"[MeSH] OR outcome assessment[tiab] OR outcome measure\*[tw] OR "observer variation"[MeSH] OR observer variation[tiab] OR "Health Status Indicators"[Mesh] OR "reproducibility of results"[MeSH] OR reproducib\*[tiab] OR "discriminant analysis"[MeSH] OR reliab\*[tiab] OR unreliab\*[tiab] OR valid\*[tiab] OR coefficient[tiab] OR homogeneity[tiab] OR homogeneous[tiab] OR "internal consistency"[tiab] OR (cronbach\*[tiab] AND (alpha[tiab] OR alphas[tiab])) OR (item[tiab] AND (correlation\*[tiab] OR selection\*[tiab] OR reduction\*[tiab])) OR agreement[tiab] OR precision[tiab] OR imprecision[tiab] OR "precise values"[tiab] OR test–retest[tiab] OR (test[tiab] AND retest[tiab]) OR (reliab\*[tiab] AND (test[tiab] OR retest[tiab])) OR stability[tiab] OR interrater[tiab] OR inter-rater[tiab] OR intrarater[tiab] OR intra-rater[tiab] OR intertester[tiab] OR inter-tester[tiab] OR intratester[tiab] OR intra-tester[tiab] OR interobserver[tiab] OR inter-observer[tiab] OR intraobserver[tiab] OR intraobserver[tiab] OR intertechnician[tiab] OR inter-technician[tiab] OR intratechnician[tiab] OR intra-technician[tiab] OR interexaminer[tiab] OR inter-examiner[tiab] OR intraexaminer[tiab] OR intra-examiner[tiab] OR interassay[tiab] OR inter-assay[tiab] OR intraassay[tiab] OR intra-assay[tiab] OR interindividual[tiab] OR inter-individual[tiab] OR

intraindividual[tiab] OR intra-individual[tiab] OR interparticipant[tiab] OR inter-participant[tiab] OR intraparticipant[tiab] OR intra-participant[tiab] OR kappa[tiab] OR kappa's[tiab] OR kappas[tiab] OR repeatab\* [tiab] OR ((replicab\* [tiab] OR repeated[tiab]) AND (measure[tiab] OR measures[tiab] OR findings[tiab] OR result[tiab] OR results[tiab] OR test[tiab] OR tests[tiab])) OR generaliza\* [tiab] OR generalisa\* [tiab] OR concordance[tiab] OR (intraclass[tiab] AND correlation\* [tiab]) OR discriminative[tiab] OR "known group"[tiab] OR factor analysis[tiab] OR factor analyses[tiab] OR dimension\* [tiab] OR subscale\* [tiab] OR (multitrait[tiab] AND scaling[tiab] AND (analysis[tiab] OR analyses[tiab])) OR item discriminant[tiab] OR interscale correlation\* [tiab] OR error[tiab] OR errors[tiab] OR "individual variability"[tiab] OR (variability[tiab] AND (analysis[tiab] OR values[tiab])) OR (uncertainty[tiab] AND (measurement[tiab] OR measuring[tiab])) OR "standard error of measurement"[tiab] OR sensitiv\* [tiab] OR responsive\* [tiab] OR ((minimal[tiab] OR minimally[tiab] OR clinical[tiab] OR clinically[tiab]) AND (important[tiab] OR significant[tiab] OR detectable[tiab])) AND (change[tiab] OR difference[tiab])) OR (small\* [tiab] AND (real[tiab] OR detectable[tiab]) AND (change[tiab] OR difference[tiab])) OR meaningful change[tiab] OR "ceiling effect"[tiab] OR "floor effect"[tiab] OR "Item response model"[tiab] OR IRT[tiab] OR Rasch[tiab] OR "Differential item functioning"[tiab] OR DIF[tiab] OR "computer adaptive testing"[tiab] OR "item bank"[tiab] OR "cross-cultural equivalence"[tiab])) NOT ("addresses"[Publication Type] OR "biography"[Publication Type] OR "case reports"[Publication Type] OR "comment"[Publication Type] OR "directory"[Publication Type] OR "editorial"[Publication Type] OR "festschrift"[Publication Type] OR "interview"[Publication Type] OR "lectures"[Publication Type] OR "legal cases"[Publication Type] OR "legislation"[Publication Type] OR "letter"[Publication Type] OR "news"[Publication Type] OR "newspaper article"[Publication Type] OR "patient education handout"[Publication Type] OR "popular works"[Publication Type] OR "congresses"[Publication Type] OR "consensus development conference"[Publication Type] OR "consensus development conference, nih"[Publication Type] OR "practice guideline"[Publication Type]) NOT ("animals"[MeSH Terms] NOT "humans"[MeSH Terms]))

### **Search strategy for EMBASE**

- From inception to February 2, 2021
- Validation studies filters used: *Translation from* Terwee CB, Jansma EP, Riphagen II, de Vet HC. [Development of a methodological PubMed search filter for finding studies on measurement properties of measurement instruments](#). Qual Life Res. 2009 Oct;18(8):1115-23. doi: 10.1007/s11136-009-9528-5.

((('intermethod comparison'/exp OR 'intermethod comparison' OR 'data collection method'/exp OR 'data collection method' OR 'validation study'/exp OR 'validation study' OR 'feasibility study'/exp OR 'feasibility study' OR 'pilot study'/exp OR 'pilot study' OR 'psychometry'/exp OR 'psychometry' OR 'reproducibility'/exp OR 'reproducibility' OR reproducib\*:ab,ti OR 'audit':ab,ti OR psychometr\*:ab,ti OR clinimetr\*:ab,ti OR clinometr\*:ab,ti OR 'observer variation'/exp OR 'observer variation' OR 'observer

variation':ab,ti OR 'discriminant analysis'/exp OR 'discriminant analysis' OR 'validity'/exp OR 'validity' OR 'reliab\*':ab,ti OR 'valid\*':ab,ti OR 'coefficient':ab,ti OR 'internal consistency':ab,ti OR '(cronbach\*':ab,ti AND ('alpha':ab,ti OR 'alphas':ab,ti)) OR 'item correlation':ab,ti OR 'item correlations':ab,ti OR 'item selection':ab,ti OR 'item selections':ab,ti OR 'item reduction':ab,ti OR 'item reductions':ab,ti OR 'agreement':ab,ti OR 'precision':ab,ti OR 'imprecision':ab,ti OR 'precise values':ab,ti OR 'test-retest':ab,ti OR ('test':ab,ti AND 'retest':ab,ti) OR (reliab\*':ab,ti AND ('test':ab,ti OR 'retest':ab,ti)) OR 'stability':ab,ti OR 'interrater':ab,ti OR 'inter-rater':ab,ti OR 'intrarater':ab,ti OR 'intra-rater':ab,ti OR 'intertester':ab,ti OR 'inter-tester':ab,ti OR 'intratester':ab,ti OR 'intra-tester':ab,ti OR 'interobserver':ab,ti OR 'inter-observer':ab,ti OR 'intraobserver':ab,ti OR 'intra-observer':ab,ti OR 'intertechician':ab,ti OR 'inter-technician':ab,ti OR 'intraexaminer':ab,ti OR 'intra-examiner':ab,ti OR 'interassay':ab,ti OR 'inter-assay':ab,ti OR 'intraassay':ab,ti OR 'intra-assay':ab,ti OR 'interindividual':ab,ti OR 'inter-individual':ab,ti OR 'intraindividual':ab,ti OR 'intra-individual':ab,ti OR 'interparticipant':ab,ti OR 'inter-participant':ab,ti OR 'intraparticipant':ab,ti OR 'intra-participant':ab,ti OR 'kappa':ab,ti OR 'kappas':ab,ti OR 'coefficient of variation':ab,ti OR 'repeatab\*':ab,ti OR ((replicab\*':ab,ti OR 'repeated':ab,ti) AND ('measure':ab,ti OR 'measures':ab,ti OR 'findings':ab,ti OR 'result':ab,ti OR 'results':ab,ti OR 'test':ab,ti OR 'tests':ab,ti)) OR 'generaliza\*':ab,ti OR 'generalisa\*':ab,ti OR 'concordance':ab,ti OR ('intraclass':ab,ti AND 'correlation\*':ab,ti) OR 'discriminative':ab,ti OR 'known group':ab,ti OR 'factor analysis':ab,ti OR 'factor analyses':ab,ti OR 'factor structure':ab,ti OR 'factor structures':ab,ti OR 'dimensionality':ab,ti OR 'subscale\*':ab,ti OR 'multitrait scaling analysis':ab,ti OR 'multitrait scaling analyses':ab,ti OR 'item discriminant':ab,ti OR 'interscale correlation':ab,ti OR 'interscale correlations':ab,ti OR (('error':ab,ti OR 'errors':ab,ti) AND ('measure\*':ab,ti OR 'correlat\*':ab,ti OR 'evaluat\*':ab,ti OR 'accuracy':ab,ti OR 'accurate':ab,ti OR 'precision':ab,ti OR 'mean':ab,ti)) OR 'individual variability':ab,ti OR 'interval variability':ab,ti OR 'rate variability':ab,ti OR 'variability analysis':ab,ti OR ('uncertainty':ab,ti AND ('measurement':ab,ti OR 'measuring':ab,ti)) OR 'standard error of measurement':ab,ti OR 'sensitivity':ab,ti OR 'responsive\*':ab,ti OR ('limit':ab,ti AND 'detection':ab,ti) OR 'minimal detectable concentration':ab,ti OR 'interpretab\*':ab,ti OR ('small\*':ab,ti AND ('real':ab,ti OR 'detectable':ab,ti) AND ('change':ab,ti OR 'difference':ab,ti)) OR 'meaningful change':ab,ti OR 'minimal important change':ab,ti OR 'minimal important difference':ab,ti OR 'minimally important change':ab,ti OR 'minimally important difference':ab,ti OR 'minimal detectable change':ab,ti OR 'minimal detectable difference':ab,ti OR 'minimally detectable change':ab,ti OR 'minimally detectable difference':ab,ti OR 'minimal real change':ab,ti OR 'minimal real difference':ab,ti OR 'minimally real change':ab,ti OR 'minimally real difference':ab,ti OR 'ceiling effect':ab,ti OR 'floor effect':ab,ti OR 'item response model':ab,ti OR 'irt':ab,ti OR 'rasch':ab,ti OR 'differential item functioning':ab,ti OR 'dif':ab,ti OR 'computer adaptive testing':ab,ti OR 'item bank':ab,ti OR 'cross-cultural equivalence':ab,ti) AND [embase]/lim) AND (('cutaneous lupus erythematosus disease area and severity index'/exp OR 'cutaneous lupus erythematosus disease area and severity index' OR 'clasi':ab,ti,kw OR 'score of activity and damage':ab,ti,kw OR 'saddle':ab,ti,kw OR 'physician global assessment'/exp OR 'physician global assessment' OR 'physician global assessment score'/exp OR 'physician global assessment score' OR 'physician global assessment of disease activity'/exp OR 'physician global assessment of disease activity' OR 'investigator global assessment'/exp OR 'investigator global assessment' OR 'investigator global assessment scale'/exp OR 'investigator global assessment scale' OR 'investigator global assessment score'/exp OR 'investigator global assessment score' OR 'iga':ab,ti,kw OR 'pga':ab,ti,kw OR 'dermatology life quality index'/exp OR 'dermatology life quality index' OR 'skindex'/exp OR 'skindex' OR 'skindex 29 score'/exp OR 'skindex 29 score' OR 'skindex 29 questionnaire'/exp OR 'skindex 29 questionnaire' OR 'skindex 29'/exp OR 'skindex 29' OR 'skindex 16'/exp OR 'skindex 16' OR 'skindex 17'/exp OR 'skindex 17' OR 'skindex':ab,ti,kw OR 'life quality':ab,ti,kw OR 'quality of life':ab,ti,kw OR 'dlqi':ab,ti,kw OR 'short form 36'/exp OR 'short form 36' OR 'short form':ab,ti,kw OR 'sf 36':ab,ti,kw OR 'sf36':ab,ti,kw OR 'european quality of life 5 dimensions questionnaire'/exp OR 'european quality of life 5 dimensions questionnaire' OR 'eq' AND '5d':ab,ti,kw OR 'eq 5d':ab,ti,kw OR 'eq5d':ab,ti,kw OR 'eqol 5d':ab,ti,kw OR 'euroqol':ab,ti,kw OR 'euroqol 5 dimension\*':ab,ti,kw OR 'euroqol 5d':ab,ti,kw OR 'cleqol':ab,ti,kw OR 'sleqol':ab,ti,kw OR 'lupusqol':ab,ti,kw OR 'l qol':ab,ti,kw OR 'pain numeric rating scale'/exp OR 'pain numeric rating scale' OR 'pain numerical rating scale'/exp OR 'pain numerical rating scale' OR 'visual analogue scale'/exp OR 'visual analogue scale' OR 'numeric rating scale'/exp OR 'numeric rating scale' OR 'verbal rating

scale'/exp OR 'verbal rating scale' OR 'numeric rating score' OR 'itch numeric rating scale'/exp OR 'itch numeric rating scale' OR 'itch severity scale'/exp OR 'itch severity scale' OR 'mcgill pain questionnaire'/exp OR 'mcgill pain questionnaire' OR 'brief pain inventory'/exp OR 'brief pain inventory' OR 'brief pain inventory short form'/exp OR 'brief pain inventory short form' OR 'visual analogue scale':ab,ti,kw OR 'numeric rating scale':ab,ti,kw OR 'numerical rating scale':ab,ti,kw OR 'vas':ab,ti,kw OR 'nrs':ab,ti,kw OR 'itch scale':ab,ti,kw OR 'promis itch':ab,ti,kw OR 'mcgill pain':ab,ti,kw OR 'brief pain inventory':ab,ti,kw OR 'patient global assessment'/exp OR 'patient global assessment' OR 'patient global assessment of disease activity'/exp OR 'patient global assessment of disease activity' OR 'patient global assessment score'/exp OR 'patient global assessment score' OR 'patient global impression of change'/exp OR 'patient global impression of change' OR 'patient global impression of change scale'/exp OR 'patient global impression of change scale' OR 'patient global impression of improvement'/exp OR 'patient global impression of improvement' OR 'patient global impression of improvement questionnaire'/exp OR 'patient global impression of improvement questionnaire' OR 'patient global impression of improvement score'/exp OR 'patient global impression of improvement score' OR 'patient global impression of improvement scale'/exp OR 'patient global impression of improvement scale' OR 'global skin health':ab,ti,kw OR 'global improvement':ab,ti,kw OR 'global assessment':ab,ti,kw OR 'global impression':ab,ti,kw) AND ('skin lupus erythematosus'/exp OR 'skin lupus erythematosus':ti,ab,kw OR 'cutaneous and lupus':ti,ab,kw OR 'discoid lupus erythematosus' OR 'discoid lupus':ti,ab,kw OR 'chilblain' OR 'chilblain':ti,ab,kw OR 'lupus panniculitis' OR 'lupus panniculitis':ti,ab,kw OR 'lupus profundus' OR 'lupus profundus':ti,ab,kw OR 'lupus tumidus' OR 'lupus tumidus':ti,ab,kw)

### Appendix 3: Results of CLE and SLE RCTs

**Table I. Characteristics of CLE Randomized Controlled Trials From MEDLINE/EMBASE**

| Study                         | Study Phase        | Study Population           | Intervention                  | Comparison                           | Study Outcomes                                                                                                                                                                                                                                                                     | Measurement Instrument(s) Used                                                                                                                                                                                                                                                  | Domains                                                                                                                            |
|-------------------------------|--------------------|----------------------------|-------------------------------|--------------------------------------|------------------------------------------------------------------------------------------------------------------------------------------------------------------------------------------------------------------------------------------------------------------------------------|---------------------------------------------------------------------------------------------------------------------------------------------------------------------------------------------------------------------------------------------------------------------------------|------------------------------------------------------------------------------------------------------------------------------------|
| Tzung 2007                    | NA                 | Facial CLE +/- SLE         | Tacrolimus 0.1% ointment      | Clobetasol propionate 0.05% ointment | Severity of lesions based on clinical signs of erythema, desquamation, induration, and telangiectasias using a 7-point scale (0: none, 1: mild, 2: moderate, 3: severe, at 0.5 increments), side effects                                                                           | -                                                                                                                                                                                                                                                                               | Skin-specific disease activity, side effects                                                                                       |
| Jemec 2009                    | Phase 2            | DLE                        | R-salbutamol 0.5% cream       | Placebo                              | Lesion-specific CLASI after 8 weeks, pain and itch, general improvement scored by investigator, global improvement of lesions by patient, size of lesion, plasma concentration of R-salbutamol, adverse events                                                                     | Lesion-specific CLASI, IGA for general improvement (-1 to 3), PtGA of lesion global improvement (-1 to 3), VAS pain and itch (0: no pain/no itching to 10: worse possible pain/worse imaginable itching)                                                                        | Skin-specific disease activity, pain and itch, IGA, PtGA of lesion global improvement, safety and adverse events, pharmacokinetics |
| Wang 2015                     | NA                 | Labial DLE, without SLE    | Tacrolimus 0.03% ointment     | Triamcinolone acetonide 0.1% cream   | Surface areas of erosion, erythema and reticulation, pain NRS, safety                                                                                                                                                                                                              | Physically measured surface areas of erosion, erythema and reticulation, NRS (0-10) for pain                                                                                                                                                                                    | Skin-specific disease activity, pain, safety                                                                                       |
| Rerknimitr 2019 / NCT03178188 | Phase 2<br>Phase 3 | DLE                        | Vbeam 595 nm pulsed-dye laser | Sham treatment with cryogen spray    | Antera 3D to evaluate erythema and texture/irregularity of DLE lesions, lesion-specific CLASI scores (activity and damage), IGA of lesion improvement                                                                                                                              | Antera 3D (erythema and texture index), lesion-specific CLASI, IGA of improvement of lesions (-4: worsen 76–100%, -3: worsen 51–75%, -2: worsen 26–50%, -1: worsen 1–25%, 0: no difference, +1: improved 1–25%, +2: improved 26–50%, +3: improved 51–75%, +4: improved 76–100%) | Skin-specific disease activity and damage, IGA of improvement                                                                      |
| Presto 2018 / NCT01597050     | Phase 2            | DLE                        | Topical R333 ointment         | Placebo ointment                     | ≥50% decrease in erythema and scaling for lesions based on CLASI, change from baseline in activity score of target lesions, change in baseline erythema score and scaling, change from baseline in IGA and PtGA of disease activity of lesions                                     | Lesion-specific degree of erythema (0-3), scaling/hypertrophy (0-2) adapted from CLASI; horizontal VAS for IGA and PtGA of disease activity of lesions                                                                                                                          | Skin-specific disease activity, IGA of activity, PtGA of activity                                                                  |
| Kuhn 2011 / NCT00317681       | Phase 2            | CLE                        | Tacrolimus 0.1%               | Vehicle control                      | Difference between baseline and last visit in clinical evaluation scores of skin lesions                                                                                                                                                                                           | Digital photography and clinical evaluation                                                                                                                                                                                                                                     | Skin-specific disease activity                                                                                                     |
| Morita 2016 / NCT01551069     | Phase 3            | CLE +/- SLE                | Hydroxychloroquine            | Placebo                              | Pharmacokinetics                                                                                                                                                                                                                                                                   | -                                                                                                                                                                                                                                                                               | Pharmacokinetics                                                                                                                   |
| Kraak 1965                    | NA                 | DLE                        | Hydroxychloroquine            | Placebo                              | Clinical change on a scale of -1: deterioration after cure, 0: unchanged also continuing of cure, +1: improved and cured after improvement in earlier periods, +2: cured without improvement or deterioration in earlier periods, +3: cured after deterioration in earlier periods | -                                                                                                                                                                                                                                                                               | Skin-specific disease activity                                                                                                     |
| Levy 2001                     | NA                 | SLE or DLE, pregnant women | Hydroxychloroquine            | Placebo                              | SLEDAI scores for disease activity (0-3: no activity, 4-11: moderate activity, >12: severe activity), Apgar scores, ophthalmologic exam, pediatrician examination of children 1.5-3 years later                                                                                    | SLEDAI                                                                                                                                                                                                                                                                          | Skin-specific disease activity, side effects                                                                                       |

|                                    |             |                                                                                |                                                 |                                         |                                                                                                                                                                                                                                                                                                                                                                                                                                                                                                                 |                                                                                                    |                                                                                                                                |
|------------------------------------|-------------|--------------------------------------------------------------------------------|-------------------------------------------------|-----------------------------------------|-----------------------------------------------------------------------------------------------------------------------------------------------------------------------------------------------------------------------------------------------------------------------------------------------------------------------------------------------------------------------------------------------------------------------------------------------------------------------------------------------------------------|----------------------------------------------------------------------------------------------------|--------------------------------------------------------------------------------------------------------------------------------|
| <b>Barikbin 2009</b>               | Pilot study | Facial DLE without SLE                                                         | Pimecrolimus 1% cream                           | Betamethasone 17-valerate 0.1% cream    | Clinical severity score - rate erythema, infiltration and presence of scale (0: normal, 1: slight, 2: moderate, 3: severe), added together to get 0-9 score. Mild: 1-3, moderate: 4-6, severe: 7-9                                                                                                                                                                                                                                                                                                              | -                                                                                                  | Skin-specific disease activity                                                                                                 |
| <b>Yokogawa 2017 / NCT01551069</b> | Phase 3     | CLE +/- SLE                                                                    | Hydroxychloroquine                              | Placebo                                 | Change in CLASI activity score (response rate defined as 4 point or 20% decrease in CLASI-A score), IGA (7-point scale based on central photo evaluation which is a 5-point scale, PtGA on a 7-point scale and Skindex-29), for SLE patients: pain and fatigue VAS, PtGA of SLE, RAPID3, IGA of SLE (7-point) and BILAG, anti-ds DNA, complement levels, steroid dose, safety endpoints (adverse event, serious events, lab test values, vital signs, ophthalmologic examinations), population pharmacokinetics | IGA, PtGA for CLE, CLASI, Skindex-29, BILAG, PtGA for SLE (0-10 VAS), pain and fatigue VAS, RAPID3 | Skin-specific disease activity, PtGA, quality of life, pharmacokinetics, corticosteroid use, safety, lab values, pain, fatigue |
| <b>Ruzicka 1992</b>                | NA          | DLE or SCLE without SLE, LE profundus                                          | Acitretin                                       | Hydroxychloroquine                      | Erythema, infiltration and scaling/hyperkeratosis score (0: absent, 1: moderate, 2: severe), clearance (1: improvement and 2: no change or deterioration), area of skin affected, clinical and lab findings, adverse events, LE specific lab tests, blood count, UA, overall investigator assessment of efficacy (complete clearing with or without central atrophy 90-100% improvement, marked improvement 50-89%, slight improvement 25-49%, no change <25%, deterioration < 0% improvement)                  | IGA of efficacy                                                                                    | Skin-specific disease activity, safety, lab values, IGA of efficacy                                                            |
| <b>Bjornberg 1976</b>              | NA          | DLE                                                                            | Betamethasone-17,21-dipropionate 0.05% ointment | Betamethasone-17-valerate 0.1% ointment | Rate side was better, equal or worse                                                                                                                                                                                                                                                                                                                                                                                                                                                                            | -                                                                                                  | Skin-specific disease activity                                                                                                 |
| <b>Kuhn 2011</b>                   | NA          | DLE, LE tumidus, SCLE, without SLE                                             | Sunscreen                                       | Vehicle                                 | Positive photoprovocation test, histologic analysis, adverse events                                                                                                                                                                                                                                                                                                                                                                                                                                             | -                                                                                                  | Skin-specific disease activity, safety                                                                                         |
| <b>Pothinamthong 2012</b>          | NA          | DLE                                                                            | Tacrolimus 0.1% ointment                        | Clobetasol propionate 0.05% ointment    | CLASI (excluding scalp, mucous membrane and alopecia score), PtGA (patient evaluated each side for 0 to 4 level of improvement score compared with before study using the scale 0: not improved, 1: mild improved 1-25%, 2: moderate improved 26-50%, 3: marked improved 51-75%, and 4: excellent improved 75-100%)                                                                                                                                                                                             | Modified CLASI-A and D excluding scalp, mucous membranes and alopecia, PtGA for improvement        | Skin-specific disease activity, skin-specific disease damage, PtGA of improvement of skin/lesions                              |
| <b>Furie 2019</b>                  | Phase 1     | SLE patients with ACLE, SCLE, and/or CCLE                                      | BIIB059                                         | Placebo                                 | CLASI-A, SLEDAI, safety endpoints (adverse events, vital signs, EKG, labs), immunologic labs, serum antibodies to BIIB059, pharmacokinetics, histology                                                                                                                                                                                                                                                                                                                                                          | CLASI-A, SLEDAI                                                                                    | Safety, tolerability, immunogenicity, pharmacokinetics, SLE disease activity, skin-specific disease activity                   |
| <b>Medeiros Bezerra 2005</b>       | NA          | SLE patients with active typical malar rash and/or discoid lesions and/or SCLE | Clofazimine                                     | Chloroquine disphosphate                | Lab values, immunologic labs, change from baseline in the Mexican version of the SLEDAI, rating of cutaneous lupus lesions (6: total response, 5: good response, improvement of >50% of the lesion, 4: partial response, improvement of <50% of the lesions, 3: no response, no improvement of                                                                                                                                                                                                                  | Mex-SLEDAI                                                                                         | Immunologic tests, lab values, skin-specific disease activity, SLE disease activity                                            |



|                             |         |                                          |                                         |                                        |                                                                                                                                                                                                                                                                                                           |                                                        |                                                                                                                                                    |
|-----------------------------|---------|------------------------------------------|-----------------------------------------|----------------------------------------|-----------------------------------------------------------------------------------------------------------------------------------------------------------------------------------------------------------------------------------------------------------------------------------------------------------|--------------------------------------------------------|----------------------------------------------------------------------------------------------------------------------------------------------------|
|                             |         |                                          |                                         |                                        | lesions, 2: worsening, deterioration of existing lesions, 1: new lesions)                                                                                                                                                                                                                                 |                                                        |                                                                                                                                                    |
| <b>Masek-Hammerman 2016</b> | Phase 1 | SCLE or DLE, +/- SLE                     | PD-0360324                              | Placebo                                | Pharmacokinetics, pharmacodynamics, CD14+ CD16 + monocyte fluorescence activated cell sorter assay, tissue immunohistochemistry, routine lab safety tests, absolute change from baseline in CLASI activity and damage scores, SLEDAI-2K scores, IGA (100 mm VS), adverse events                           | CLASI-A, CLASI-D, SLEDAI-2K, IGA (100 mm VAS)          | Pharmacokinetics, pharmacodynamics, immunologic labs, adverse events, safety, skin-specific disease activity and damage, SLE disease activity, IGA |
| <b>Werth 2017</b>           | Phase 1 | DLE                                      | AMG 811                                 | Placebo                                | Changes related to IFN gamma in serum and skin, CXCL10 protein concentrations in serum, adverse events, changes in CLASI-A and CLASI-D, IGA of skin disease, PtGA of skin disease, SLEDAI-2K, pharmacodynamics                                                                                            | CLASI-A, CLASI-D, IGA, PtGA of skin disease, SLEDAI-2K | Pharmacodynamics, safety, skin-specific disease activity and damage, SLE disease activity, PtGA of skin disease, IGA of skin disease               |
| <b>Walker 2020</b>          | Phase 1 | CACLE, SCLE                              | GSK2646264                              | Placebo                                | Safety (adverse events, labs, vital signs, EKG, physical assessments), pharmacokinetic parameters, change from baseline in R-CLASI-A, mRNA expression in skin related to IFN, skin tolerability test (dermal response from 0: no evidence of irritation to 7: strong reaction spreading beyond test site) | R-CLASI-A                                              | Safety, tolerability, pharmacokinetics, skin-specific disease activity, immunologic labs                                                           |
| <b>Szepietowski 2013</b>    | Phase 1 | CLE (including SCLE, DLE and LE tumidus) | Sirukumab                               | Placebo                                | Safety (adverse events, vital signs, EKG, safety-related labs), pharmacokinetics, antibodies to sirukumab, immunologic labs, CLASI change from baseline, SF-36, DLQI                                                                                                                                      | CLASI, SF-36, DLQI                                     | Safety, pharmacokinetics, immunologic labs, skin-specific disease activity and damage, quality of life                                             |
| <b>Bjornberg 1966</b>       | NA      | DLE                                      | Betamethasone-17-valerate 0.1% ointment | Fluocinolone acetonide 0.025% ointment | Change from baseline in redness, scaling, infiltration, and distribution of lesions                                                                                                                                                                                                                       | -                                                      | Skin-specific disease activity                                                                                                                     |

DLE, discoid lupus erythematosus; CLASI(-A and -D), Cutaneous Lupus Erythematosus Disease Area and Severity Index(-Activity and -Damage); IGA, investigator global assessment; PtGA, patient global assessment; VAS, visual analogue scale; NRS, numeric rating scale; SLEDAI, SLE Disease Activity Index; RAPID3, Routine Assessment of Patient Index Data; BILAG, British Isles Lupus Assessment Group; SCLE, subacute CLE; ACLE, acute CLE; SLEDAI-2K, SLE Disease Activity Index-2000; IFN, interferon; R-CLASI-A, Revised-CLASI-Activity; SF-36, Short Form Health Survey; DLQI, Dermatology Life Quality Index

**Table II: CLE RCT Eligible Protocols Identified in Clinicaltrials.gov**

| Study       | Study Phase | Study Population                           | Intervention                                       | Comparison         | Study Outcomes                                                                                                                                                                                                                                                                                                                                                                                                                                                                                                                                                                                                                                          | Measurement Instrument(s) Used                               | Domains                                                                                                                                                             |
|-------------|-------------|--------------------------------------------|----------------------------------------------------|--------------------|---------------------------------------------------------------------------------------------------------------------------------------------------------------------------------------------------------------------------------------------------------------------------------------------------------------------------------------------------------------------------------------------------------------------------------------------------------------------------------------------------------------------------------------------------------------------------------------------------------------------------------------------------------|--------------------------------------------------------------|---------------------------------------------------------------------------------------------------------------------------------------------------------------------|
| NCT00470912 | Phase 3     | Chronic CLE without SLE                    | Sunscreen RV 2547C                                 | Not specified      | Not specified                                                                                                                                                                                                                                                                                                                                                                                                                                                                                                                                                                                                                                           | -                                                            | -                                                                                                                                                                   |
| NCT03122431 | Phase 4     | CLE (other subarms with SLE, juvenile SLE) | Thalidomide (hydroxychloroquine for other subarms) | Not specified      | Improvement in CLASI, disease flares evaluated using SLEDAI-2K, disease flares evaluated using SLEDAI (no further details), drug serum levels                                                                                                                                                                                                                                                                                                                                                                                                                                                                                                           | CLASI, SLEDAI-2K, SLEDAI                                     | Skin-specific disease activity and damage, SLE disease flares                                                                                                       |
| NCT03134222 | Phase 2     | CLE (SCLE, CCLE)                           | Lanraplenib, Filgotinib                            | Placebo            | Change in CLASI-A score from baseline, decrease in CLASI-A by $\geq 5$ points from baseline, no worsening in CLASI-A score                                                                                                                                                                                                                                                                                                                                                                                                                                                                                                                              | CLASI-A                                                      | Skin-specific disease activity                                                                                                                                      |
| NCT00523588 | Phase 2     | CLE                                        | Laser treatment (Candela Vbeam Perfecta™)          | Untreated lesion   | CLASI and modified CLASI, pain and itch relief compared to baseline (not further specified), reduction or increase in CLASI and modified CLASI scores                                                                                                                                                                                                                                                                                                                                                                                                                                                                                                   | CLASI, modified CLASI                                        | Skin-specific disease activity and damage, pain, itch                                                                                                               |
| NCT01300208 | Phase 2     | DLE or SCLE                                | CC-11050                                           | Placebo            | Lab values for safety concerns, pharmacokinetics, response rate based on CLASI                                                                                                                                                                                                                                                                                                                                                                                                                                                                                                                                                                          | CLASI                                                        | Safety, pharmacokinetics, skin-specific disease activity and damage                                                                                                 |
| NCT02847598 | Phase 2     | SLE with skin and joint involvement, CLE   | BIIB059                                            | Placebo            | Change from baseline in 28-joint assessment and CLASI-A, CLASI-50 response, % change in CLASI-A score from baseline, $\geq 4$ point CLASI-A reduction from baseline, composite SRI response ( $\geq 4$ points in SLEDAI-2K, no new BILAG-2004 A and no more than one new B, $< 0.3$ point increase in IGA VAS, no protocol-prohibited medication or treatment, concomitant corticosteroid dosage $\leq 10$ mg/day, concomitant corticosteroid dosage $\leq$ Day 1 corticosteroid dosage, and no increase in corticosteroid dose), change in SLEDAI-2K score, no new BILAG-2004 A and no more than one new BILAG-2004 B, change from baseline in IGA VAS | CLASI-A, SRI, SLEDAI-2K, BILAG, IGA VAS, 28-joint assessment | Skin-specific disease activity, SLE disease activity, joint symptoms, IGA                                                                                           |
| NCT01294774 | Phase 2     | SCLE                                       | KRP203                                             | Placebo            | Efficacy in reduction of severity of symptoms as measured by CLASI, safety and tolerability, blood concentration of drug, patient and investigator VAS for global skin health, SLEDAI                                                                                                                                                                                                                                                                                                                                                                                                                                                                   | CLASI, SLEDAI, IGA and PtGA VAS for global skin health       | Skin-specific disease activity and damage, safety and tolerability, pharmacokinetics, IGA for global skin health, PtGA for global skin health, SLE disease activity |
| NCT01498406 | Phase 2     | CLE without SLE                            | High dose vitamin D                                | Low dose vitamin D | Severity as measured by CLASI, quality of life measured by Skindex-29, serum vitamin D level                                                                                                                                                                                                                                                                                                                                                                                                                                                                                                                                                            | CLASI, Skindex-29                                            | Skin-specific disease activity and damage, quality of life                                                                                                          |
| NCT01466725 | Phase 2     | DLE without SLE                            | CC-930                                             | Placebo            | Adverse events, pharmacokinetics                                                                                                                                                                                                                                                                                                                                                                                                                                                                                                                                                                                                                        | -                                                            | Safety, pharmacokinetics                                                                                                                                            |

|             |         |            |                     |                            |                                                                                                                                                                                                                                                        |                                                                                            |                                                                                                             |
|-------------|---------|------------|---------------------|----------------------------|--------------------------------------------------------------------------------------------------------------------------------------------------------------------------------------------------------------------------------------------------------|--------------------------------------------------------------------------------------------|-------------------------------------------------------------------------------------------------------------|
| NCT03958955 | Phase 2 | DLE        | Delgocitinib cream  | Delgocitinib cream vehicle | Lesion-specific IGA severity score of 0 (clear) or 1 (almost clear), adverse events, $\geq 2$ point reduction in IGA score, $\geq 2$ point reduction in erythema score for lesion using CLASI, total disease activity score based on CLASI and R-CLASI | IGA of lesion severity (0: clear, 4: severe), CLASI, R-CLASI (lesion-specific and overall) | Skin-specific and lesion-specific disease activity, IGA of lesion severity, safety, global disease severity |
| NCT00625521 | Phase 2 | DLE or SLE | ASF 1096 0.5% cream | Cream vehicle              | Safety profile, CLASI score, IGA, PtGA                                                                                                                                                                                                                 | CLASI, IGA, PtGA                                                                           | Skin-specific disease activity, IGA, PtGA                                                                   |

Note: Clinical trials NCT00317681, NCT01551069, NCT01597050, and NCT03178188 overlapped with published studies from MEDLINE/EMBASE (see Table 1) and were thus omitted.

CLASI(-A), Cutaneous Lupus Erythematosus Disease Area and Severity Index(-Activity); SLEDAI, SLE Disease Activity Index; SLEDAI-2K, SLE Disease Activity Index-2000; SCLC, subacute CLE; CCLC, chronic CLE; SRI, SLE Responder Index; BILAG, British Isles Lupus Assessment Group; IGA, investigator global assessment; VAS, visual analogue scale; PtGA, patient global assessment; R-CLASI, Revised CLASI; DLE, discoid lupus erythematosus

**Table III: SLE RCT Protocols Identified in Clinicaltrials.gov**

| NCT Number  | Phase   | Intervention                                                         | Comparison                                   | Measurement Instrument(s) Used                                                                                                                                                                                         | Domains                                                                                                                                                                                |
|-------------|---------|----------------------------------------------------------------------|----------------------------------------------|------------------------------------------------------------------------------------------------------------------------------------------------------------------------------------------------------------------------|----------------------------------------------------------------------------------------------------------------------------------------------------------------------------------------|
| NCT02794285 | Phase 3 | Anifrolumab                                                          | Placebo                                      | -                                                                                                                                                                                                                      | Safety, adverse events                                                                                                                                                                 |
| NCT02446899 | Phase 3 | Anifrolumab                                                          | Placebo                                      | BICLA, CLASI-A, Joint Counts                                                                                                                                                                                           | SLE disease activity, steroid use, skin-specific disease activity, disease flare, adverse events, vitals and lab value changes                                                         |
| NCT02446912 | Phase 3 | Anifrolumab                                                          | Placebo                                      | SRI4, SLE Responder Index, CLASI-A, BICLA, SELENA-SLEDAI Flare Index, Columbia Suicide Severity Rating Scale, PHQ-8                                                                                                    | SLE disease activity, steroid use, safety, adverse events, skin-specific disease activity, vital signs/physical exam/ECG/lab abnormality, disease flares, suicide ideation, depression |
| NCT04294667 | Phase 3 | DZP                                                                  | Placebo                                      | BICLA, LLDAS, BILAG, SLEDAI-2K, IGA of SLE signs and symptoms and functional capacity of the study participant, SRI-4                                                                                                  | SLE disease activity, disease flares, adverse events, IGA of SLE disease activity and function                                                                                         |
| NCT03312907 | Phase 3 | Belimumab + rituximab then standard of therapy; belimumab + standard | Belimumab + placebo then standard of therapy | Modified SLE flare index, SLEDAI-2K, IGA of disease activity (VAS), SLICC damage index, LLDAS, PtGA of current disease activity (rate severity of SLE between 0: very well and 10: very poor), LupusQoL, FACIT-Fatigue | SLE disease activity, SLE disease remission, disease flare, SLE disease damage, adverse events, PtGA of disease severity/activity, quality of life, fatigue, IGA of disease activity   |
| NCT03843125 | Phase 3 | Baricitinib high dose                                                | Baricitinib low dose                         | SRI-4, LLDAS, SELENA-SLEDAI flare rate, CLASI-A, Tender and Swollen Joint Count, SLICC Damage index, Worst Pain NRS                                                                                                    | Adverse events, SLE disease activity, steroid use, disease flares, skin-specific disease activity, joint pain, SLE disease damage, pain                                                |
| NCT03616964 | Phase 3 | Baricitinib high and low dose                                        | Placebo                                      | SRI-4, LLDAS, Worst pain NRS, FACIT-Fatigue, CLASI-A, Tender and Swollen Joint Count                                                                                                                                   | SLE disease activity, disease flare, steroid use, pain, fatigue, skin-specific disease activity, joint pain, pharmacokinetics                                                          |
| NCT03616912 | Phase 3 | Baricitinib high and low dose                                        | Placebo                                      | SRI-4, LLDAS, Worst Pain NRS, FACIT-Fatigue, CLASI-A, Tender and Swollen Joint Count                                                                                                                                   | SLE disease activity, disease flare, steroid use, pain, fatigue, skin-specific disease activity, joint pain, pharmacokinetics                                                          |
| NCT04082416 | Phase 3 | RC18                                                                 | Placebo                                      | SRI-4, SELENA-SLEDAI score, IGA of disease activity (VAS 0-100 mm)                                                                                                                                                     | SLE disease activity, steroid use, lab values, disease flare, IGA of disease activity                                                                                                  |
| NCT04060888 | Phase 3 | Ustekinumab                                                          | Placebo                                      | SRI-4, number of joints with pain and signs of inflammation, CLASI-A                                                                                                                                                   | SLE disease activity, disease flare, joint pain, steroid use, skin-specific disease activity,                                                                                          |
| NCT00413361 | Phase 4 | Hydroxychloroquine                                                   | Placebo                                      | SELENA-SLEDAI flare index, SF-36, SELENA-SLEDAI, analogical visual scale (not further specified)                                                                                                                       | Disease flare, steroid use, quality of life, treatment tolerance/side effects                                                                                                          |
| NCT03517722 | Phase 3 | Ustekinumab                                                          | Placebo                                      | SRI-4, number of joints with pain and signs of inflammation, CLASI-A                                                                                                                                                   | SLE disease activity, disease flare, joint pain, steroid use, skin-specific disease activity                                                                                           |
| NCT02953821 | Phase 4 | Acthar gel                                                           | Placebo gel                                  | IGA of disease activity (100 mm VAS), BILAG, SLEDAI-2K, SELENA flare index, CLASI-A, 28-Joint Count                                                                                                                    | IGA of disease activity, SLE disease activity, disease flare, skin-specific disease activity, joint pain, steroid use                                                                  |
| NCT00470522 | Phase 3 | Methotrexate and folic acid                                          | Placebo                                      | SLAM, SLICC Damage Index, SF-36, SLEDAI                                                                                                                                                                                | SLE disease activity and damage, quality of life                                                                                                                                       |

|             |         |                                                          |                                      |                                                                                                                                                        |                                                                                                                                           |
|-------------|---------|----------------------------------------------------------|--------------------------------------|--------------------------------------------------------------------------------------------------------------------------------------------------------|-------------------------------------------------------------------------------------------------------------------------------------------|
| NCT01632241 | Phase 4 | Belimumab + standard therapy                             | Placebo + standard therapy           | SRI, SLE Flare Index, Division of Microbiology and Infectious Diseases Adult Toxicity Adverse Event Severity Grading                                   | SLE disease activity, renal disease, adverse events, toxicity, disease flare, steroid use                                                 |
| NCT01484496 | Phase 3 | Belimumab + standard therapy                             | Placebo + standard therapy           | SRI, SLE Flare Index                                                                                                                                   | SLE disease activity, disease flare, steroid use                                                                                          |
| NCT01345253 | Phase 3 | Belimumab                                                | Placebo                              | SRI-4, SRI-7, SELENA-SLEDAI, SLE Flare Index                                                                                                           | SLE disease activity, steroid use, disease flare                                                                                          |
| NCT02504645 | Phase 3 | IPP-201101                                               | Placebo                              | SRI                                                                                                                                                    | SLE disease activity                                                                                                                      |
| NCT01395745 | Phase 3 | Blisibimod                                               | Placebo                              | SRI, number of tender or swollen joints                                                                                                                | SLE disease activity, steroid use, disease flare, joint pain, renal disease, mucocutaneous disease, safety, immunologic labs              |
| NCT01597492 | Phase 4 | Belimumab + early vaccination                            | Belimumab plus late vaccination      | -                                                                                                                                                      | Antibody response to vaccination                                                                                                          |
| NCT01408576 | Phase 3 | Epratuzumab 600 mg per week                              | Epratuzumab 1200 mg every other week | BILAG, SLEDAI, IGA of disease                                                                                                                          | Adverse events, SLE disease activity, IGA of disease                                                                                      |
| NCT01322308 | Phase 4 | Pioglitazone                                             | Placebo                              | -                                                                                                                                                      | Cardiovascular disease markers                                                                                                            |
| NCT01262365 | Phase 3 | Epratuzumab, 600 mg per week or 1200 mg every other week | Placebo                              | BILAG, SLEDAI-2K, IGA of disease activity                                                                                                              | SLE disease activity, steroid use, IGA of disease activity                                                                                |
| NCT00410384 | Phase 3 | Belimumab 1 mg/kg, 10 mg/kg                              | Placebo                              | SRI, SELENA-SLEDAI, IGA of disease activity (from 0 to 3, 1: mild, 3: severe), SF-36                                                                   | SLE disease activity, quality of life, steroid use, IGA of disease activity                                                               |
| NCT01261793 | Phase 3 | Epratuzumab, 600 mg per week or 1200 mg every other week | Placebo                              | BILAG, SLEDAI-2K, IGA of disease activity                                                                                                              | SLE disease activity, steroid use, IGA of disease activity                                                                                |
| NCT00424476 | Phase 3 | Belimumab 1 mg/kg or 10 mg/kg                            | Placebo                              | SRI, SELENA-SLEDAI, IGA of disease activity (from 0 to 3, 1: mild, 3: severe), SF-36                                                                   | SLE disease activity, quality of life, steroid use, IGA of disease activity                                                               |
| NCT02514967 | Phase 3 | Blisibimod                                               | Placebo                              | SRI-6                                                                                                                                                  | SLE disease activity, SLE flare, skin-specific disease activity, joint pain, steroid use, renal disease, adverse events, immunologic labs |
| NCT00739050 | Phase 4 | Simvastatin                                              | Placebo                              | -                                                                                                                                                      | Vascular function, cardiovascular labs                                                                                                    |
| NCT00082511 | Phase 3 | Prasterone (GL701)                                       | Placebo                              | -                                                                                                                                                      | Bone density                                                                                                                              |
| NCT00504244 | Phase 3 | Switch to Myfortic                                       | Continuation of azathioprine         | SLEDAI, BILAG, SF-36                                                                                                                                   | SLE disease activity, renal disease, steroid use, quality of life                                                                         |
| NCT00383214 | Phase 3 | Epratuzumab                                              | Placebo                              | BILAG, IGA, PtGA                                                                                                                                       | Renal disease, SLE disease activity, PtGA, IGA, steroid use, pharmacokinetics, quality of life                                            |
| NCT01753401 | Phase 4 | Acthar                                                   | Placebo                              | SELENA-SLEDAI, IGA of disease severity (100 mm VAS from none to severe), BILAG, Tender or Swollen Joints, CLASI-A, Krupp Fatigue Severity Score, SF-36 | SLE disease activity, IGA of disease severity, joint pain, fatigue, quality of life, skin-specific disease activity                       |

|             |         |                                                                               |                                                                                     |                                                                                                                                                              |                                                                                                                                       |
|-------------|---------|-------------------------------------------------------------------------------|-------------------------------------------------------------------------------------|--------------------------------------------------------------------------------------------------------------------------------------------------------------|---------------------------------------------------------------------------------------------------------------------------------------|
| NCT02074020 | Phase 3 | Blisibimod                                                                    | Placebo                                                                             | SRI-8                                                                                                                                                        | SLE disease activity, disease flare, joint pain, skin disease activity, renal disease, steroid use, immunology labs, adverse events   |
| NCT00539838 | Phase 3 | Ocrelizumab                                                                   | Placebo                                                                             | BILAG, SLEDAI-2K, SF-36, FACIT-Fatigue, Brief Pain Inventory, EQ-5D                                                                                          | Renal disease, SLE disease activity, disease flare, quality of life, fatigue, pain, health economics, adverse events                  |
| NCT00111306 | Phase 3 | Epratuzumab                                                                   | Placebo                                                                             | BILAG, IGA, PtGA                                                                                                                                             | SLE disease activity, PtGA, IGA, steroid use, quality of life                                                                         |
| NCT00668330 | Phase 4 | Ibandronate + alfacalcidol + calcium                                          | Placebo                                                                             | -                                                                                                                                                            | Bone density, fractures                                                                                                               |
| NCT00336414 | Phase 3 | Prednisone + oral cyclophosphamide                                            | High dose IV cyclophosphamide, intermediate dose IV cyclophosphamide + azathioprine | IGA of disease activity on a 10 cm VAS, European Consensus Lupus Activity Measure, Parent's/Patient's Global Assessment of Overall Well-being                | SLE disease activity, quality of life, PtGA of well-being, steroid use, renal disease, IGA of disease activity, drop-out              |
| NCT02741960 | Phase 4 | Metformin                                                                     | Placebo                                                                             | -                                                                                                                                                            | Disease flares, steroid use, BMI changes, adverse events                                                                              |
| NCT02779153 | Phase 4 | Acthar low dose                                                               | Acthar high dose                                                                    | SLEDAI, BILAG, IGA of disease activity (10 cm VAS), SELENA Flare Index, SLICC damage index, SF-36, FACIT-Fatigue, PtGA for SLE disease activity (100 mm VAS) | SLE disease activity, disease flares, SLE disease damage, quality of life, fatigue, IGA of disease activity, PtGA of disease activity |
| NCT01705977 | Phase 4 | Belimumab + standard therapy                                                  | Placebo + standard therapy                                                          | -                                                                                                                                                            | Mortality, adverse events, steroid use                                                                                                |
| NCT00392093 | Phase 4 | Conjugated equine estrogens 0.625 mg/d + MPA 5 mg/d/10d                       | Placebo                                                                             | SLEDAI                                                                                                                                                       | SLE disease activity, disease flare, bone density, mammographic changes, cardiovascular labs                                          |
| NCT02477150 | Phase 4 | Zostavax                                                                      | Placebo                                                                             | -                                                                                                                                                            | Immune response to vaccination                                                                                                        |
| NCT00004662 | Phase 3 | Dehydroepiandrosterone                                                        | Placebo                                                                             | -                                                                                                                                                            | -                                                                                                                                     |
| NCT00724867 | Phase 3 | Belimumab 1mg/kg                                                              | Belimumab 10 mg/kg                                                                  | SLICC Damage Index, SF-36, FACIT-Fatigue                                                                                                                     | Adverse events, immunologic labs, lab changes, vitals, renal function, steroid use, SLE disease damage, quality of life, fatigue      |
| NCT02041091 | Phase 3 | Tabalumab auto-injector                                                       | Tabalumab prefilled syringe                                                         | SQAAQ                                                                                                                                                        | Pharmacokinetics, patient drug administration ability                                                                                 |
| NCT00626197 | Phase 3 | Ocrelizumab 400 mg + standard of care, ocrelizumab 1000 mg + standard of care | Placebo + standard of care                                                          | SLEDAI-2K, SF-36, FACIT-Fatigue, Modified Brief Pain Inventory Short Form                                                                                    | Renal disease, SLE disease activity, renal flare, quality of life, fatigue, healthcare utilization, steroid use, immunologic labs     |
| NCT00188188 | Phase 4 | Quinipril                                                                     | Placebo                                                                             | -                                                                                                                                                            | -                                                                                                                                     |
| NCT03042260 | Phase 4 | Trimethoprim-Sulfamethoxazole                                                 | Placebo                                                                             | -                                                                                                                                                            | Adverse events, mortality                                                                                                             |
| NCT00000420 | Phase 3 | Ortho-Novum 777                                                               | Placebo                                                                             | -                                                                                                                                                            | -                                                                                                                                     |
| NCT00000419 | Phase 3 | Premarin and Provera                                                          | Placebo                                                                             | -                                                                                                                                                            | -                                                                                                                                     |
| NCT01488708 | Phase 3 | LY2127399                                                                     | Placebo                                                                             | SRI, SLEDAI, LupusQoL                                                                                                                                        | Adverse events, SLE disease activity, steroid use, disease flare, quality of life, immunologic labs                                   |
| NCT00065806 | Phase 3 | Atorvastatin                                                                  | Placebo                                                                             | -                                                                                                                                                            | Cardiovascular labs, vascular function                                                                                                |

|             |                    |                                  |                                     |                                                                                                                                                                                                                                       |                                                                                                                             |
|-------------|--------------------|----------------------------------|-------------------------------------|---------------------------------------------------------------------------------------------------------------------------------------------------------------------------------------------------------------------------------------|-----------------------------------------------------------------------------------------------------------------------------|
| NCT04515719 | Phase 4            | Belimumab                        | Placebo                             | SELENA-SLEDAI Flare Index, SELENA-SLEDAI, BILAG                                                                                                                                                                                       | Disease flares, steroid use, SLE disease activity, adverse events                                                           |
| NCT01205438 | Phase 3            | LY2127399                        | Placebo                             | SRI, SLEDAI-2K, SLE Flare Index, IGA of disease activity (100 mm VAS with benchmarks of 0, 1, 2, and 3 corresponding to no, mild, moderate, and severe SLE disease activity), LupusQoL, Brief Fatigue Inventory, BILAG, SELENA-SLEDAI | SLE disease activity, steroid use, immunologic labs, disease flare, quality of life, fatigue, IGA of disease activity       |
| NCT01196091 | Phase 3            | LY2127399                        | Placebo                             | SRI, SLEDAI-2K, SELENA-SLEDAI, SLE Flare Index, IGA of disease activity (100 mm VAS with benchmarks of 0, 1, 2, and 3 corresponding to no, mild, moderate, and severe SLE disease activity), Brief Fatigue Inventory, LupusQoL, BILAG | SLE disease activity, steroid use, immunologic labs, fatigue, quality of life, IGA of disease activity                      |
| NCT02558517 | Phase 3            | Prednisone discontinuation       | Prednisone maintenance              | SLE Flare Index                                                                                                                                                                                                                       | Disease flare                                                                                                               |
| NCT00866229 | Phase 4            | Rosuvastatin                     | Simvastatin                         | -                                                                                                                                                                                                                                     | Cardiovascular labs                                                                                                         |
| NCT00371501 | Phase 4            | Rosuvastatin, aspirin            | Placebo                             | -                                                                                                                                                                                                                                     | Cardiovascular markers, thrombotic events, adverse events                                                                   |
| NCT01101802 | Phase 4            | Mycophenolate mofetil            | Placebo                             | BILAG, SLEDAI                                                                                                                                                                                                                         | Vascular function, SLE disease activity                                                                                     |
| NCT04275193 | Phase 2<br>Phase 3 | Zishenqing                       | Placebo                             | SF-36, LupusQoL, SLEDAI                                                                                                                                                                                                               | Quality of life, SLE disease activity                                                                                       |
| NCT03979976 | Phase 2<br>Phase 3 | Ramipril                         | No intervention                     | -                                                                                                                                                                                                                                     | Vascular function                                                                                                           |
| NCT03543839 | Phase 4            | Belimumab                        | Placebo                             | SRI, LLDAS, DORIS, SELENA-SLEDAI                                                                                                                                                                                                      | Immunologic labs, disease flare, SLE disease activity, adverse events and safety, cardiovascular disease, disease remission |
| NCT03098823 | Phase 4            | RAYOS                            | Prednisone                          | FACIT-Fatigue                                                                                                                                                                                                                         | Fatigue                                                                                                                     |
| NCT04127747 | Phase 4            | Standard dose of rituximab       | Individualized dose of rituximab    | -                                                                                                                                                                                                                                     | SLE disease activity                                                                                                        |
| NCT00005778 | Phase 3            | High-dose immunoablative therapy | Monthly IV cyclophosphamide         | RIFLE                                                                                                                                                                                                                                 | Renal disease                                                                                                               |
| NCT01112215 | Phase 4            | Azathioprine                     | Enteric-Coated mycophenolate sodium | SLEDAI, BILAG                                                                                                                                                                                                                         | SLE disease activity, disease remission, disease flares                                                                     |
| NCT00828178 | Phase 4            | Omega-3                          | Corn starch                         | -                                                                                                                                                                                                                                     | Vascular blood flow, SLE disease activity, inflammatory markers                                                             |
| NCT00089804 | Phase 3            | Abetimus sodium                  | Placebo                             | -                                                                                                                                                                                                                                     | Renal flare, disease flare, renal disease                                                                                   |
| NCT00611663 | Phase 2<br>Phase 3 | Prevnar + Pneumo23               | Placebo                             | SLEDAI                                                                                                                                                                                                                                | SLE disease activity, immune response to vaccination                                                                        |
| NCT00624338 | Phase 2<br>Phase 3 | Atacicept                        | Placebo                             | BILAG                                                                                                                                                                                                                                 | Disease flare, steroid use                                                                                                  |
| NCT00137969 | Phase 2<br>Phase 3 | Rituximab + prednisone           | Placebo + prednisone                | BILAG, SF-36                                                                                                                                                                                                                          | Renal disease, SLE disease activity, disease flare                                                                          |

|             |                    |                                                     |                                                   |                                                                                                                                 |                                                                                                                                  |
|-------------|--------------------|-----------------------------------------------------|---------------------------------------------------|---------------------------------------------------------------------------------------------------------------------------------|----------------------------------------------------------------------------------------------------------------------------------|
| NCT01773616 | Phase 3            | Rituximab                                           | Oral prednisolone                                 | BILAG                                                                                                                           | Renal disease, adverse events, steroid use, SLE disease activity, renal flare, immunologic labs                                  |
| NCT00120887 | Phase 4            | Atorvastatin                                        | Placebo                                           | -                                                                                                                               | Cardiovascular function, vascular measures, bone mineral density                                                                 |
| NCT00432354 | Phase 2<br>Phase 3 | Atorvastatin                                        | Placebo                                           | SLEDAI, Raynaud's Condition Score                                                                                               | SLE disease activity, microcirculation                                                                                           |
| NCT00189124 | Phase 2<br>Phase 3 | Dehydroepiandrosterone                              | Placebo                                           | SLEDAI                                                                                                                          | Cardiovascular markers, immunologic labs, SLE disease activity                                                                   |
| NCT00004795 | Phase 2<br>Phase 3 | Dehydroepiandrosterone                              | Dehydroepiandrosterone different dose             | -                                                                                                                               | -                                                                                                                                |
| NCT00430677 | Phase 2<br>Phase 3 | Abatacept + corticosteroids + mycophenolate mofetil | Placebo + corticosteroids + mycophenolate mofetil | SLICC Damage Index, SF-36, fatigue VAS, Krupp Fatigue Severity Scale                                                            | Renal disease, SLE disease damage, quality of life, fatigue, adverse events, labs, vital signs, immunologic measures             |
| NCT01014260 | Phase 4            | Doxycycline                                         | Placebo                                           | -                                                                                                                               | Inflammatory labs                                                                                                                |
| NCT00368264 | Phase 2<br>Phase 3 | Infliximab                                          | Placebo                                           | SIS, SLEDAI, SF-36, Fatigue Severity Scale                                                                                      | Renal disease, SLE disease activity, quality of life, fatigue                                                                    |
| NCT00053560 | Phase 3            | Prasterone (GL701)                                  | Placebo                                           | -                                                                                                                               | -                                                                                                                                |
| NCT00035308 | Phase 3            | Abetimus sodium                                     | Placebo                                           | -                                                                                                                               | -                                                                                                                                |
| NCT01359826 | Phase 4            | Milnacipran                                         | Placebo                                           | Fatigue Severity Scale, Short Form McGill Pain Questionnaire, Fatigue VAS, Pain VAS, SF-36, Patient Global Impression of Change | Fatigue, pain, quality of life, PtGA of change                                                                                   |
| NCT04424602 | Phase 4            | Cyclophosphamide                                    | Mycophenolate                                     | -                                                                                                                               | Renal disease, immunologic labs, labs                                                                                            |
| NCT04221477 | Phase 3            | Obinutuzuma                                         | Placebo                                           | SLEDAI-2K, FACIT-Fatigue                                                                                                        | Renal disease, immunologic labs, SLE disease activity, fatigue, adverse events, pharmacokinetics                                 |
| NCT04181762 | Phase 3            | Secukinumab                                         | Placebo                                           | FACIT-Fatigue, SF-36, LupusQoL                                                                                                  | Renal disease, steroid use, fatigue, quality of life, adverse events                                                             |
| NCT04146220 | Phase 4            | Prednisolone low dose                               | Prednisolone high dose                            | -                                                                                                                               | Renal disease remission                                                                                                          |
| NCT04145687 | Phase 4            | Metformin                                           | Placebo                                           | SLEDAI                                                                                                                          | SLE disease activity, renal disease, steroid use                                                                                 |
| NCT03920059 | Phase 4            | Mycophenolate mofetil dosed based on blood level    | Mycophenolate mofetil fixed dose                  | -                                                                                                                               | Adverse events, pharmacokinetics, immunologic labs, renal disease                                                                |
| NCT03859570 | Phase 4            | Pentoxifylline                                      | Placebo                                           | SLEDAI, PtGA of disease activity (0-10 with 10 being the worst), IGA of disease activity (0-10 with 10 being the worst)         | Renal disease, SLE disease activity, PtGA of disease activity, steroid use, IGA of disease activity                              |
| NCT03684564 | Phase 2<br>Phase 3 | Rivaroxaban                                         | Warfarin                                          | EQ-5D-5L                                                                                                                        | Neuroradiologic changes, vascular events, death, cardiovascular events, safety, health economics                                 |
| NCT03597464 | Phase 3            | Voclosporin                                         | Placebo                                           | SELENA-SLEDAI, SF-36                                                                                                            | Adverse events, renal disease, renal flare, SLE disease activity, immunologic labs, quality of life, health resource utilization |
| NCT03214731 | Phase 4            | Artesunate                                          | Placebo                                           | -                                                                                                                               | Disease remission                                                                                                                |
| NCT03021499 | Phase 3            | Voclosporin                                         | Placebo                                           | SELENA-SLEDAI                                                                                                                   | Renal disease, immunology labs, SLE disease activity, quality of life                                                            |



|             |                    |                                                                                                                   |                                                                                                                      |              |                                                                                     |
|-------------|--------------------|-------------------------------------------------------------------------------------------------------------------|----------------------------------------------------------------------------------------------------------------------|--------------|-------------------------------------------------------------------------------------|
| NCT02645565 | Phase 4            | Low dose Cyclophosphamide + Azathioprine + Methylprednisolone                                                     | High dose Cyclophosphamide + Azathioprine + Methylprednisolone                                                       | -            | Renal disease, renal and non-renal disease flares, adverse events                   |
| NCT02630628 | Phase 4            | Tacrolimus                                                                                                        | Mycophenolate mofetil                                                                                                | -            | Renal disease                                                                       |
| NCT02457221 | Phase 3            | Tacrolimus capsules + steroid                                                                                     | Cyclophosphamide injection + steroid                                                                                 | -            | Renal disease, immunologic labs                                                     |
| NCT02444728 | Phase 3            | Hydroxychloroquine                                                                                                | Cyclophosphamide                                                                                                     | -            | Renal disease                                                                       |
| NCT02256150 | Phase 3            | Mizoribine                                                                                                        | Cyclophosphamide                                                                                                     | -            | Renal disease, immunology labs                                                      |
| NCT02226341 | Phase 4            | Mycophenolate mofetil + Acthar gel BIW                                                                            | Mycophenolate mofetil + Acthar gel QOD                                                                               | -            | Renal Disease, disease flares, side effects                                         |
| NCT02081183 | Phase 3            | Mycophenolate mofetil + prednisone                                                                                | Cyclophosphamide + prednisone                                                                                        | -            | Renal disease                                                                       |
| NCT01926054 | Phase 4            | Acthar gel BIW                                                                                                    | Acthar gel TIW                                                                                                       | SLEDAI       | Adverse events, labs, renal disease                                                 |
| NCT01765842 | Phase 3            | Rituximab 2 cycles                                                                                                | Rituximab 1 cycle                                                                                                    | -            | Renal disease, safety                                                               |
| NCT01714817 | Phase 3            | BMS-188667 + mycophenolate mofetil + prednisone                                                                   | Placebo + mycophenolate mofetil + prednisone                                                                         | BILAG        | Renal disease, SLE disease activity, adverse events, pharmacokinetics, vitals, labs |
| NCT01673295 | Phase 3            | RTX infusions                                                                                                     | Standard of care                                                                                                     | -            | Renal disease                                                                       |
| NCT01646736 | Phase 2<br>Phase 3 | Tripterygium wilfordii Hook F + steroid                                                                           | Steroid + cyclophosphamide                                                                                           | -            | Renal disease, immunologic labs                                                     |
| NCT01639339 | Phase 3            | Belimumab                                                                                                         | Placebo                                                                                                              | -            | Renal disease, death                                                                |
| NCT01342016 | Phase 3            | Tacrolimus + leflunomide placebo                                                                                  | Tacrolimus placebo + leflunomide                                                                                     | -            | Renal disease                                                                       |
| NCT01299922 | Phase 3            | Cyclosporine + mycophenolic acid + prednisone                                                                     | Mycophenolic acid + prednisone                                                                                       | -            | Renal disease, adverse events                                                       |
| NCT01257802 | Phase 3            | Depot leuprolide acetate                                                                                          | Placebo                                                                                                              | -            | Fertility labs                                                                      |
| NCT01015456 | Phase 3            | Mycophenolate sodium                                                                                              | Cyclophosphamide                                                                                                     | -            | Renal disease                                                                       |
| NCT00615173 | Phase 3            | Tacrolimus                                                                                                        | Cyclophosphamide or azathioprine                                                                                     | -            | Renal disease                                                                       |
| NCT00573157 | Phase 2<br>Phase 3 | Atacicept + mycophenolate mofetil + steroids                                                                      | Placebo + mycophenolate mofetil + steroids                                                                           | -            | Renal disease, disease flares                                                       |
| NCT00539799 | Phase 3            | Prednisolone                                                                                                      | Placebo                                                                                                              | -            | Renal and non-renal disease relapse, quality of life, adverse events, renal disease |
| NCT00429377 | Phase 3            | Tacrolimus                                                                                                        | -                                                                                                                    | -            | Renal disease, immunologic labs                                                     |
| NCT00425438 | Phase 3            | Mycophenolate mofetil                                                                                             | Cyclophosphamide/azathioprine                                                                                        | -            | Renal disease                                                                       |
| NCT00404794 | Phase 3            | Prednisolone + mycophenolate mofetil                                                                              | Prednisolone + tacrolimus                                                                                            |              | Renal disease, adverse events                                                       |
| NCT00377637 | Phase 3            | Mycophenolate mofetil + steroids for induction; mycophenolate + placebo to azathioprine + steroid for maintenance | Cyclophosphamide + steroids for induction; azathioprine + placebo to mycophenolate mofetil + steroid for maintenance | BILAG, SF-36 | SLE disease activity, quality of life, adverse events, deaths, disease flare        |

|             |                    |                                         |                                            |                                                 |                                                                                                                    |
|-------------|--------------------|-----------------------------------------|--------------------------------------------|-------------------------------------------------|--------------------------------------------------------------------------------------------------------------------|
| NCT00371319 | Phase 4            | Tacrolimus                              | Mycophenolate mofetil                      | -                                               | Renal disease, mortality                                                                                           |
| NCT00282347 | Phase 3            | Rituximab                               | Placebo                                    | BILAG, SF-36                                    | Renal response/disease, SLE disease activity, immunologic labs                                                     |
| NCT00277251 | Phase 2<br>Phase 3 | Alendronate                             | Standard of care                           | -                                               | Bone density, growth, fractures                                                                                    |
| NCT00204022 | Phase 3            | Mycophenolate mofetil                   | Azathioprine                               | -                                               | Renal flares, toxicity, steroid use, renal disease                                                                 |
| NCT00508898 | Phase 4            | Calcitriol                              | Multivitamin                               | SLEDAI                                          | Renal disease, disease flare, SLE disease activity, immunologic labs                                               |
| NCT04702256 | Phase 3            | Obinutuzumab +<br>Mycophenolate mofetil | Corticosteroids +<br>mycophenolate mofetil | SELENA-SLEDAI, SLICC damage index, EQ-5D, MASRI | Renal disease, SLE disease activity, safety, adverse events, SLE disease damage, non-adherence, cost effectiveness |

Note: Clinical trials NCT01551069, NCT03178188, NCT00470912, NCT03122431 overlapped with CLE RCTs identified from Clinicaltrials.gov and were thus omitted.

BICLA, BILAG-Based Combined Lupus Assessment; BILAG, British Isles Lupus Assessment Group; CLASI(-A), Cutaneous Lupus Erythematosus Disease Area and Severity Index(-Activity); SRI, SLE Responder Index; SELENA-SLEDAI, Safety of Estrogens in Lupus Erythematosus: National Assessment - SLE Disease Activity Index; PHQ-8, Patient Health Questionnaire; LLDAS, Lupus Low Disease Activity State; SLEDAI-2K, SLE Disease Activity Index-2000; IGA, investigator global assessment; VAS, visual analogue scale; SLICC, Systemic Lupus Erythematosus International Collaborating Clinics; PtGA, patient global assessment; LupusQoL, Lupus Quality of Life; FACIT-Fatigue, Functional Assessment of Chronic Illness Therapy Fatigue; NRS, numeric rating scale; SF-36, Short Form Health Survey; SLAM, Systemic Lupus Activity Measure; SLEDAI, SLE Disease Activity Index; SQAQAQ, Subcutaneous Administration Assessment Questionnaire; DORIS, Definition of Remission in SLE; SIS, SLE Index Score; MASRI, Medication Adherence Self-Report Inventory

**Appendix 4: Outcome Measurement Instruments Identified****Table I. Physician and Patient-Reported Outcome Measurement Instruments Identified in CLE and SLE Studies**

|                           | <b>CLE RCTs</b>                                                                                                                                                                                                                         | <b>SLE RCTs</b>                                                                                                                                                                                                                                                                                                                                                                                                                                           | <b>CLE Outcome Measures SLR</b>                                         | <b>SLR of Validated CLE Measures</b>                     |
|---------------------------|-----------------------------------------------------------------------------------------------------------------------------------------------------------------------------------------------------------------------------------------|-----------------------------------------------------------------------------------------------------------------------------------------------------------------------------------------------------------------------------------------------------------------------------------------------------------------------------------------------------------------------------------------------------------------------------------------------------------|-------------------------------------------------------------------------|----------------------------------------------------------|
| <b>Physician-Reported</b> | CLASI*<br>R-CLASI*<br>SLEDAI/SELENA-SLEDAI/SLEDAI-2K<br>SRI<br>BILAG<br>IGA (unspecified, general improvement, lesion improvement, efficacy, skin disease, skin health, lesion severity, disease activity)<br>28 Joint Count/Assessment | CLASI-A*<br>SLEDAI/SELENA-SLEDAI/SLEDAI-2K<br>SRI<br>BILAG<br>IGA (unspecified, of disease activity, disease activity and patient function, disease severity)<br>28 Joint Count/Assessment<br>SLAM<br>SIS<br>SELENA Flare Index<br>BICLA<br>LLDAS<br>SLICC Damage Index<br>DORIS<br>RIFLE Classification Criteria<br>Division of Microbiology and Infectious Diseases Adult Toxicity Adverse Event Severity Grading<br>Raynaud's Condition Score<br>ECLAM | N/A                                                                     | CLASI*<br>R-CLASI*<br>SADDLE*                            |
| <b>Patient-Reported</b>   | PtGA (unspecified, global improvement of lesions, improvement, lesion disease activity, skin disease, global skin health)<br>Fatigue VAS<br>Pain NRS<br>Pain VAS<br>Pruritus VAS<br>Skindex-29<br>RAPID3<br>DLQI<br>SF-36               | PtGA (unspecified, of disease activity, global impression change)<br>Fatigue VAS<br>Worst Pain NRS<br>Pain VAS<br>Patient Global Impression of Change<br>LupusQoL<br>Parent's/Patient's Global Assessment of Overall Well-being<br>Short Form McGill Pain Questionnaire<br>Brief Pain Inventory Short Form                                                                                                                                                | Pain VAS<br>Pruritus VAS<br>Skindex-29<br>Skindex-29+3<br>DLQI<br>SF-36 | Brazilian-Portuguese DLQI<br>CLEQoL*<br>LEQoL*<br>12-PSS |

|  |  |                                                                                                                                                                      |  |  |
|--|--|----------------------------------------------------------------------------------------------------------------------------------------------------------------------|--|--|
|  |  | EQ-5D<br>SF-36<br>FACIT-Fatigue Score<br>Brief Fatigue Inventory<br>Krupp Fatigue Severity Score<br>PHQ-8<br>Columbia Suicide Severity Rating Scale<br>SQAQ<br>MASRI |  |  |
|--|--|----------------------------------------------------------------------------------------------------------------------------------------------------------------------|--|--|

SLR, systematic literature review; CLASI(-A), Cutaneous Lupus Erythematosus Disease Area and Severity Index(-Activity); R-CLASI, Revised-CLASI; SLEDAI, SLE Disease Activity Index; SELENA-SLEDAI, Safety of Estrogens in Lupus Erythematosus: National Assessment - SLE Disease Activity Index; SLEDAI-2K, SLE Disease Activity Index-2000; SRI, SLE Responder Index; BILAG, British Isles Lupus Assessment Group; IGA, investigator global assessment; SLAM, Systemic Lupus Activity Measure; SIS, SLE Index Score; BICLA, BILAG-Based Combined Lupus Assessment; LLDAS, Lupus Low Disease Activity State; SLICC, Systemic Lupus Erythematosus International Collaborating Clinics; DORIS, Definition of Remission in SLE; ECLAM, European Consensus Lupus Activity Measure; SADDLE, Score of Activity and Damage in DLE; PtGA, patient global assessment; VAS, visual analogue scale; NRS, numeric rating scale; RAPID3, Routine Assessment of Patient Index Data; DLQI, Dermatology Life Quality Index; SF-36, Short Form Health Survey; LupusQoL, Lupus Quality of Life; FACIT-Fatigue Score, Functional Assessment of Chronic Illness Therapy Fatigue Score; PHQ-8, Patient Health Questionnaire; SQAQ, Subcutaneous Administration Assessment Questionnaire; MASRI, Medication Adherence Self-Report Inventory; CLEQoL, Cutaneous Lupus Erythematosus Quality of Life; LEQoL, Lupus Erythematosus Quality of Life Questionnaire; 12-PSS; 12-Item Pruritus Severity Scale

\*CLE-specific

**Table II. Preliminary Pairing of Identified Outcome Measures to Core Domains**

|                                       | <b>Dermatologic</b>                                                                                                                                                                                                                                                                                                                                                                                                                                                                                                                                                                                                                                                                                                                                                                   | <b>Generic</b>                                                                             | <b>CLE-Specific</b>        | <b>SLE-Specific</b> |
|---------------------------------------|---------------------------------------------------------------------------------------------------------------------------------------------------------------------------------------------------------------------------------------------------------------------------------------------------------------------------------------------------------------------------------------------------------------------------------------------------------------------------------------------------------------------------------------------------------------------------------------------------------------------------------------------------------------------------------------------------------------------------------------------------------------------------------------|--------------------------------------------------------------------------------------------|----------------------------|---------------------|
| <b>Skin-specific Disease Activity</b> | N/A                                                                                                                                                                                                                                                                                                                                                                                                                                                                                                                                                                                                                                                                                                                                                                                   | N/A                                                                                        | CLASI<br>R-CLASI<br>SADDLE | N/A                 |
| <b>IGA of Disease Activity</b>        | <p>5-point IGA of lesion severity: 0 (clear) to 4 (severe)</p> <p>7-point IGA: remarkably aggravated, aggravated, slightly aggravated, not changed, slightly improved, improved, remarkably improved</p> <p>IGA of efficacy: complete clearing with or without central atrophy (90-100% improvement), marked (50-89% improvement), slight (25-49% improvement), no change (&lt;25% improvement), deterioration (&lt;0% improvement)</p> <p>9-point IGA of lesion improvement: -4: worsen 76-100%, -3: worsen 51-75%, -2: worsen 26-50%, -1: worsen 1-25%, 0: no difference, +1: improved 1-25%, +2: improved 26-50%, +3: improved 51-75%, +4: improved 76-100%</p> <p>IGA VAS of global skin health</p> <p>IGA of skin disease</p> <p>IGA VAS of disease activity of skin lesions</p> | <p>IGA (unspecified)</p> <p>IGA VAS</p> <p>5-point IGA of general improvement: -1 to 3</p> | N/A                        | N/A                 |

|                                       |                                                                                                                                                                                                                                                                                                                                              |                                                                                                      |                              |                                                                                                                                  |
|---------------------------------------|----------------------------------------------------------------------------------------------------------------------------------------------------------------------------------------------------------------------------------------------------------------------------------------------------------------------------------------------|------------------------------------------------------------------------------------------------------|------------------------------|----------------------------------------------------------------------------------------------------------------------------------|
| <b>Skin-specific Disease Damage</b>   | N/A                                                                                                                                                                                                                                                                                                                                          | N/A                                                                                                  | CLASI<br>R-CLASI<br>SADDLE   | N/A                                                                                                                              |
| <b>Health-related Quality of Life</b> | DLQI<br>Skindex-29<br>Skindex-29+3                                                                                                                                                                                                                                                                                                           | SF-36<br>EQ-5D                                                                                       | CLEQoL<br>LEQoL              | LupusPRO<br>SLEQOL<br>L-QoL<br>LupusQoL<br>LEQoL                                                                                 |
| <b>Symptoms</b>                       | DLQI<br>Skindex-29+3                                                                                                                                                                                                                                                                                                                         | Pain VAS/NRS<br>Itch VAS<br>Short Form McGill Pain Questionnaire<br>Brief Pain Inventory Short Form  |                              |                                                                                                                                  |
| <b>PtGA of Disease Activity</b>       | PtGA of Global Improvement of Lesions: -1 to 3<br><br>PtGA VAS of Lesion Disease Activity<br><br>5-point PtGA of Lesion Improvement: 0: not improved, 1: mildly improved 1-25%, 2: moderately improved 26-50%, 3: markedly improved 51-75%, 4: excellent, improved 75-100%<br><br>PtGA of Skin Disease<br><br>PtGA VAS of Global Skin Health | 7-point PtGA<br>PtGA (unspecified)<br>PtGA Overall Well-being<br>Patient Global Impression of Change | PtGA VAS of Disease Activity | PtGA of SLE on a 1-10 VAS<br><br>PtGA of Disease Activity: 0: very well, 10: very poor; 100 mm VAS; 0-10 with 10 being the worst |

CLASI, Cutaneous Lupus Erythematosus Disease Area and Severity Index; R-CLASI, Revised-CLASI; SADDLE, Score of Activity and Damage in DLE; IGA, investigator global assessment; VAS, visual analogue scale; DLQI, Dermatology Life Quality Index; SF-36, Short Form Health Survey; CLEQoL, Cutaneous Lupus Erythematosus Quality of Life; LEQoL, Lupus Erythematosus Quality of Life Questionnaire; LupusPRO, Lupus Patient Reported Outcome; SLEQOL, SLE Quality of Life; L-QoL, SLE Quality of Life; LupusQoL, Lupus Quality of Life; NRS, numeric rating scale; PtGA, patient global assessment

**Appendix 5: Studies Evaluating the Measurement Properties of Outcome Measurement Instruments in CLE****Figure 1. PRISMA Flow Chart for Validation Studies of Outcome Measures in CLE**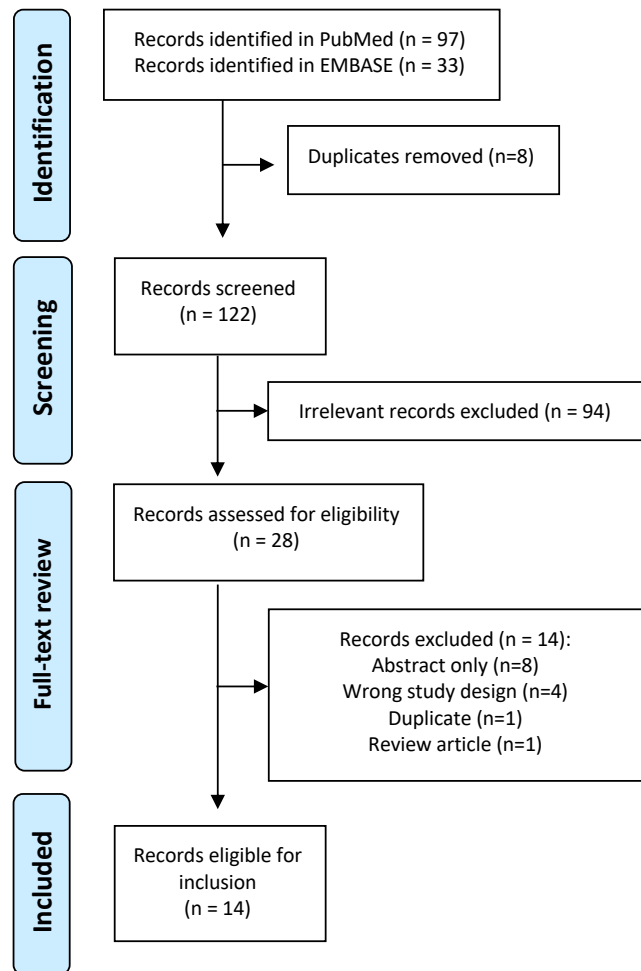

**Table I. Validation Studies Identified**

| <b>Validation Study</b>  | <b>Measurement Properties Assessed</b>                                                                                                                           |
|--------------------------|------------------------------------------------------------------------------------------------------------------------------------------------------------------|
| <b>CLASI</b>             |                                                                                                                                                                  |
| 1. Albrecht 2005         | Content validity<br>Inter-rater reliability<br>Intra-rater reliability<br>Feasibility (time to complete the assessment)                                          |
| 2. Bonilla-Martinez 2008 | Responsiveness<br>Known-groups validity                                                                                                                          |
| 3. Krathen 2008          | Inter-rater reliability<br>Intra-rater reliability                                                                                                               |
| 4. Bein 2011             | Known-groups validity                                                                                                                                            |
| 5. Klein 2011            | Construct validity<br>Known groups validity<br>Interpretability: Cut-off scores for severity groups<br>Interpretability: Cut-off scores for clinical improvement |
| 6. Jolly 2013            | Construct validity                                                                                                                                               |
| 7. Verma 2016            | Construct validity<br>Known-groups validity                                                                                                                      |
| 8. Chakka 2020           | Interpretability: minimal clinically significant improvement in disease activity                                                                                 |
| <b>RCLASI</b>            |                                                                                                                                                                  |
| 1. Kuhn 2010             | Content validity<br>Inter-rater reliability<br>Intra-rater reliability<br>Feasibility (time to complete the assessment)                                          |
| <b>SADDLE</b>            |                                                                                                                                                                  |
| 1. Wahie 2009            | Content validity<br>Inter-rater reliability<br>Intra-rater reliability<br>Known-groups validity                                                                  |
| <b>DLQI</b>              |                                                                                                                                                                  |
| 1. Ferraz 2006           | Cross-cultural validity (Brazilian version)<br>Construct validity<br>Inter-rater reliability                                                                     |
| <b>LeQoL</b>             |                                                                                                                                                                  |



|                                        |                                                                   |
|----------------------------------------|-------------------------------------------------------------------|
| 1. Castellano-Rioja 2020               | Content validity<br>Structural validity<br>Internal consistency   |
| <b>CLEQoL</b>                          |                                                                   |
| 1. Ogunsanya 2019                      | Structural validity<br>Internal consistency<br>Construct validity |
| <b>12-Item Pruritus Severity Scale</b> |                                                                   |
| 1. Stepien 2020                        | Interpretability: definition of severity bands                    |

**Appendix 6: Usage of CLASI in CLE RCTs Since Development**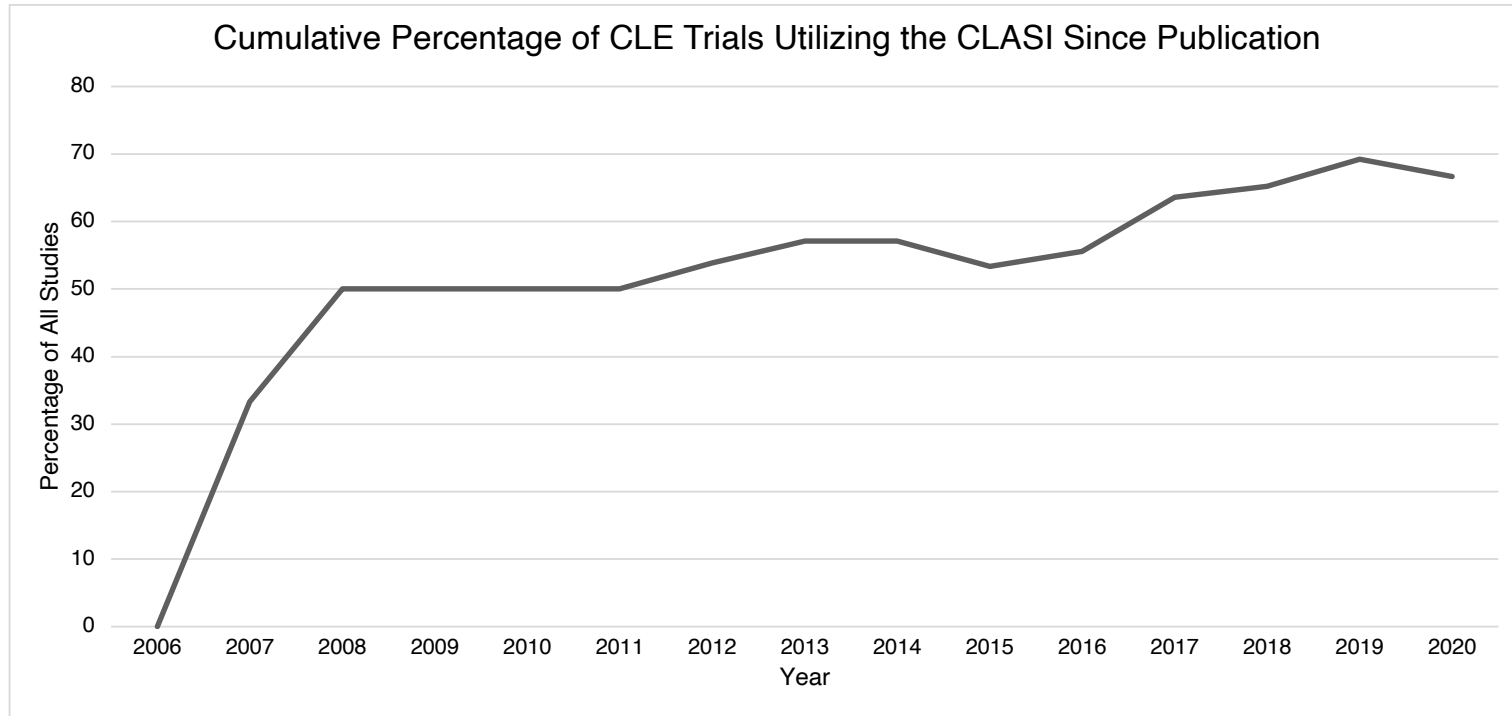

CLASI was published in 2005. Year reflects study publication date in PubMed or first posting date on ClinicalTrials.gov.

**Appendix 7: Cutaneous Lupus Activity Investigator's Global Assessment (CLA-IGA)**

| Cutaneous Lupus Activity Investigator's Global Assessment (CLA-IGA) |                                                                                                                                                                                                                                                                                                                                                                          |
|---------------------------------------------------------------------|--------------------------------------------------------------------------------------------------------------------------------------------------------------------------------------------------------------------------------------------------------------------------------------------------------------------------------------------------------------------------|
| <b>0- Clear</b>                                                     | <b>Erythema</b> - none<br><b>Scale</b> - none<br><b>Edema/infiltration</b> - none<br><b>Follicular involvement:</b> <i>follicular plugging / follicular hyperkeratosis – absent</i><br><b>Secondary Change:</b> no vesicles, erosion, crusting                                                                                                                           |
| <b>1- Almost clear</b>                                              | <b>Erythema</b> – faint<br><b>Scale</b> - minimal<br><b>Edema/infiltration</b> - minimal (barely palpable)<br><b>Follicular involvement:</b> <i>follicular plugging / follicular hyperkeratosis – minimal and diffuse</i><br><b>Secondary Change:</b> no vesicles, erosion, crusting                                                                                     |
| <b>2- Mild</b>                                                      | <b>Erythema</b> – pink/mild<br><b>Scale</b> – thin, patchy<br><b>Edema/infiltration</b> – mild, palpable, barely visible<br><b>Follicular involvement:</b> <i>follicular plugging / follicular hyperkeratosis (recent) in one quadrant of scalp</i><br><b>Secondary Change:</b> mild superficial erosion, crusting present; no vesicles                                  |
| <b>3- Moderate</b>                                                  | <b>Erythema</b> - red erythema<br><b>Scale</b> – thick, patchy<br><b>Edema/infiltration</b> – moderately raised, palpable, visible<br><b>Follicular involvement:</b> <i>follicular plugging / follicular hyperkeratosis in more than one quadrant of scalp</i><br><b>Secondary Change:</b> moderate, superficial erosion, crusting; no vesicles                          |
| <b>4- Severe</b>                                                    | <b>Erythema</b> – violaceous/bright red erythema<br><b>Scale</b> – thick, confluent<br><b>Edema/infiltration</b> – thick, raised, easily palpable, easily visible<br><b>Follicular involvement:</b> <i>follicular plugging / hyperkeratosis in more than two quadrants of scalp</i><br><b>Secondary Change:</b> Marked erosion, crusting and/or vesicular change present |

CLA-PGA Version 004, June 15, 2021

**Instructions:**

Severity is determined by a combination of 3 plaque characteristics (erythema, scale, elevation) based on descriptions of each characteristic. Scalp involvement includes an assessment of peri-follicular keratosis as noted. Scarring alopecia / areas of permanent scarring on the scalp are NOT counted.

**Erythema is the PRIMARY characteristic** that should influence the rating, with plaque elevation, scaling and other secondary characteristics considered *secondarily*. Telangiectatic change should NOT be considered.

**Assessment does NOT require all four characteristics to be present.**

Severity of the morphologic features are **AVERAGED over the burden of lesions.**

**Other Notes:**

Anchored to photographic teaching / investigator education teaching set.

© Copyright 2019 – 2021 The Brigham and Women's Hospital, Inc and the Trustees of the University of Pennsylvania. All Rights Reserved.
